# Supplementary material for: Synthesis of magnetic hollow nanotubes based on the kirkendall effect for MR contrast agent and colorimetric hydrogen peroxide sensor
Source: Royal Society of Chemistry journal article supplement (doi:10.1039/c1jm10429b), 2011-01-01
Supplement: c1jm10429b.pdf [file c1jm10429b.pdf]

## Supporting Information

### **Synthesis of Magnetic Hollow Nanotubes based on the Kirkendall Effect for MR Contrast Agent and Colorimetric Hydrogen Peroxide Sensor**

*Mei-Yi Liao,<sup>1</sup> Chih-Chia Huang,<sup>1</sup> Mong-Chen Chang,<sup>1</sup> Sheng-Feng Lin,<sup>1</sup> Tzu-Yu Liu,<sup>1</sup> Chia-Hao Su,<sup>2</sup>*

*Chen-Sheng Yeh,<sup>1</sup> and Hong-Ping Lin<sup>1\*</sup>*

*<sup>1</sup>Department of Chemistry and Center for Micro/Nano Science and Technology, National Cheng Kung  
University, Tainan 701; <sup>2</sup>Center for Translational Research in Biomedical Science Chang Gung Memorial  
Hospital-Kaohsiung Medical Center Kaohsiung 833, Taiwan*

E-mail: [hplin@mail.ncku.edu.tw](mailto:hplin@mail.ncku.edu.tw)

\*Corresponding author: [hplin@mail.ncku.edu.tw](mailto:hplin@mail.ncku.edu.tw)

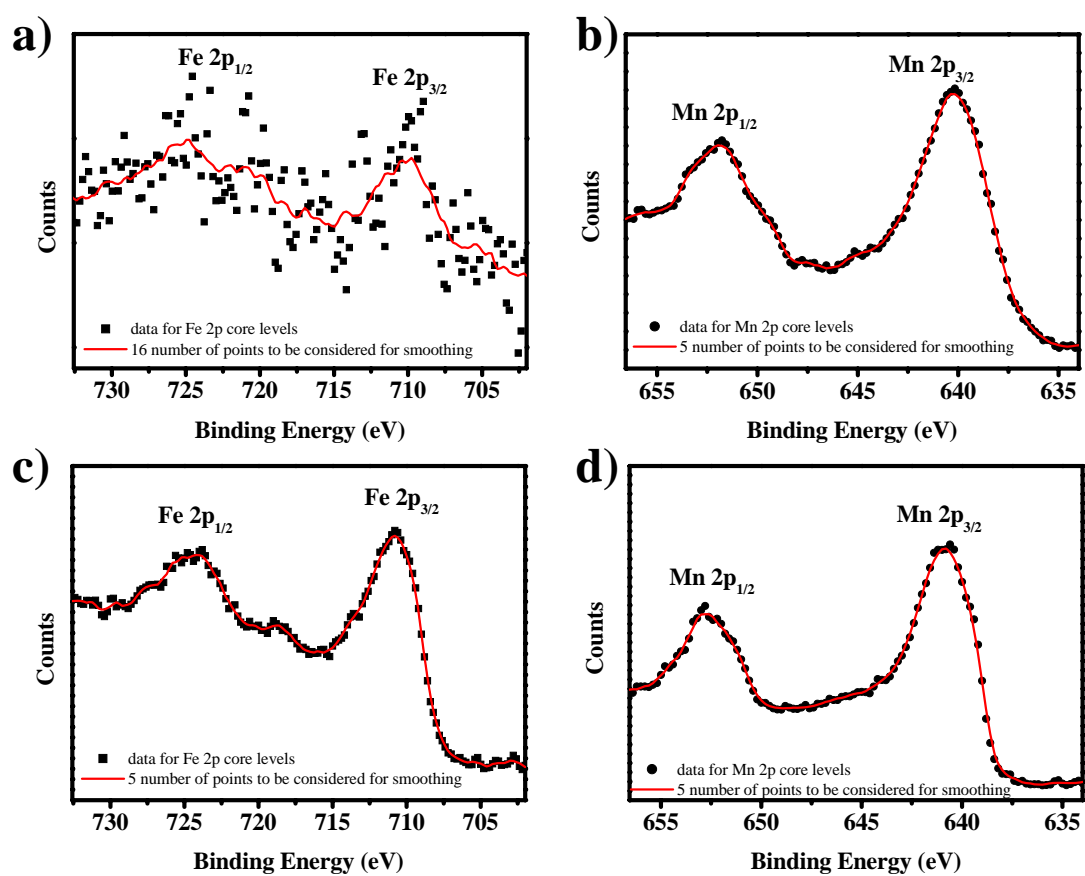

**Figure S1.** High-resolution XPS measurements of core-level spectra of a) Fe 2p and b) Mn 2p for  $\text{Mn}_{2.5}\text{Fe}_{0.5}\text{O}_4$  nanorods and c) Fe 2p and d) Mn 2p for  $\text{Mn}_{1.4}\text{Fe}_{1.6}\text{O}_4$  nanotubes.

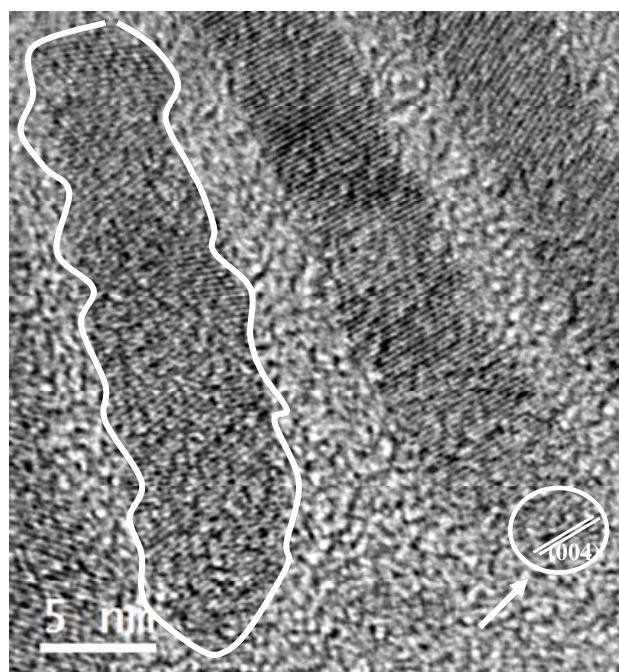

**Figure S2.** An HR-TEM image shows the pearl-like nanostructure of a  $\text{Mn}_{2.5}\text{Fe}_{0.5}\text{O}_4$  nanorod. The area enclosed in the white line on the left contains nanocrystals. The white arrow shows a hausmannite crystallite attached to a  $\text{Mn}_{2.5}\text{Fe}_{0.5}\text{O}_4$  nanorod, the lattice spacing of  $\sim 2.4 \text{ \AA}$  corresponds to (004) planes of  $\text{Mn}_3\text{O}_4$  (JCPDS File 16-0154).

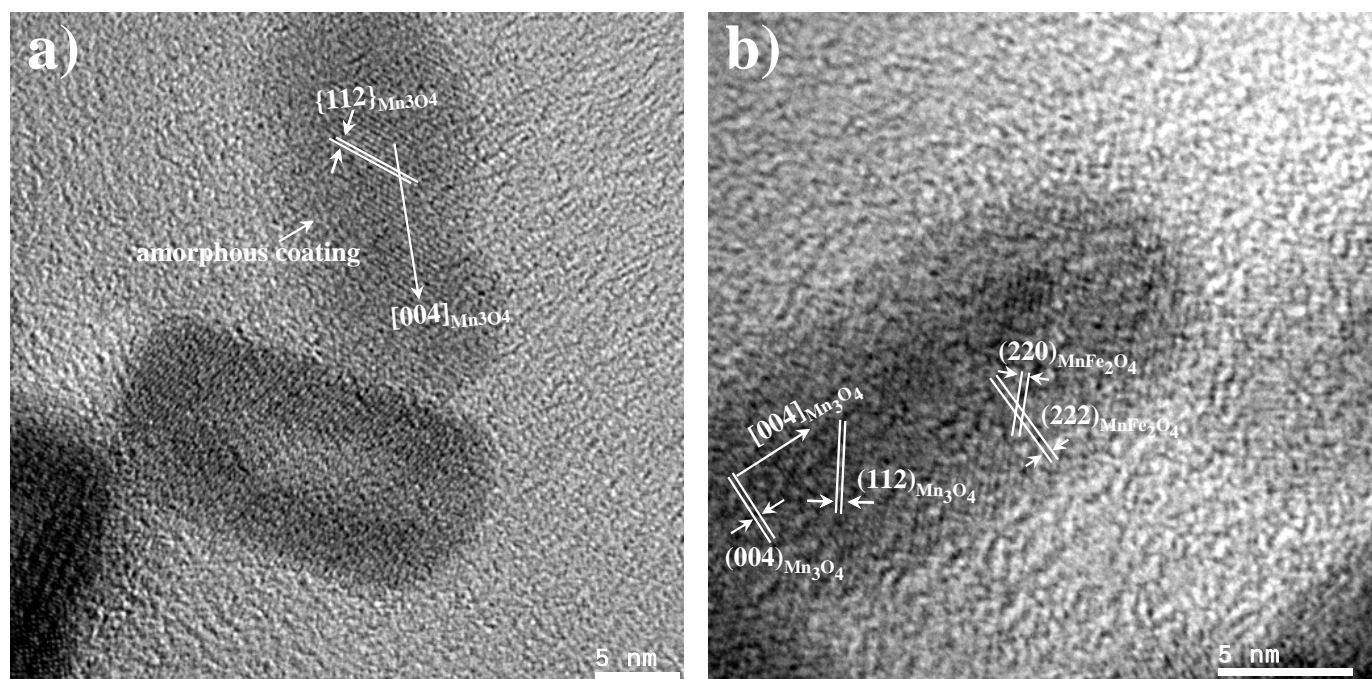

**Figure S3.** a) and b) : HRTEM images for the synthesis of Mn ferrite nanotubes after a 6-hour solvothermal reaction. The black arrow in a) shows the amorphous layer coating the [001]-grown hausmannite nanorods.

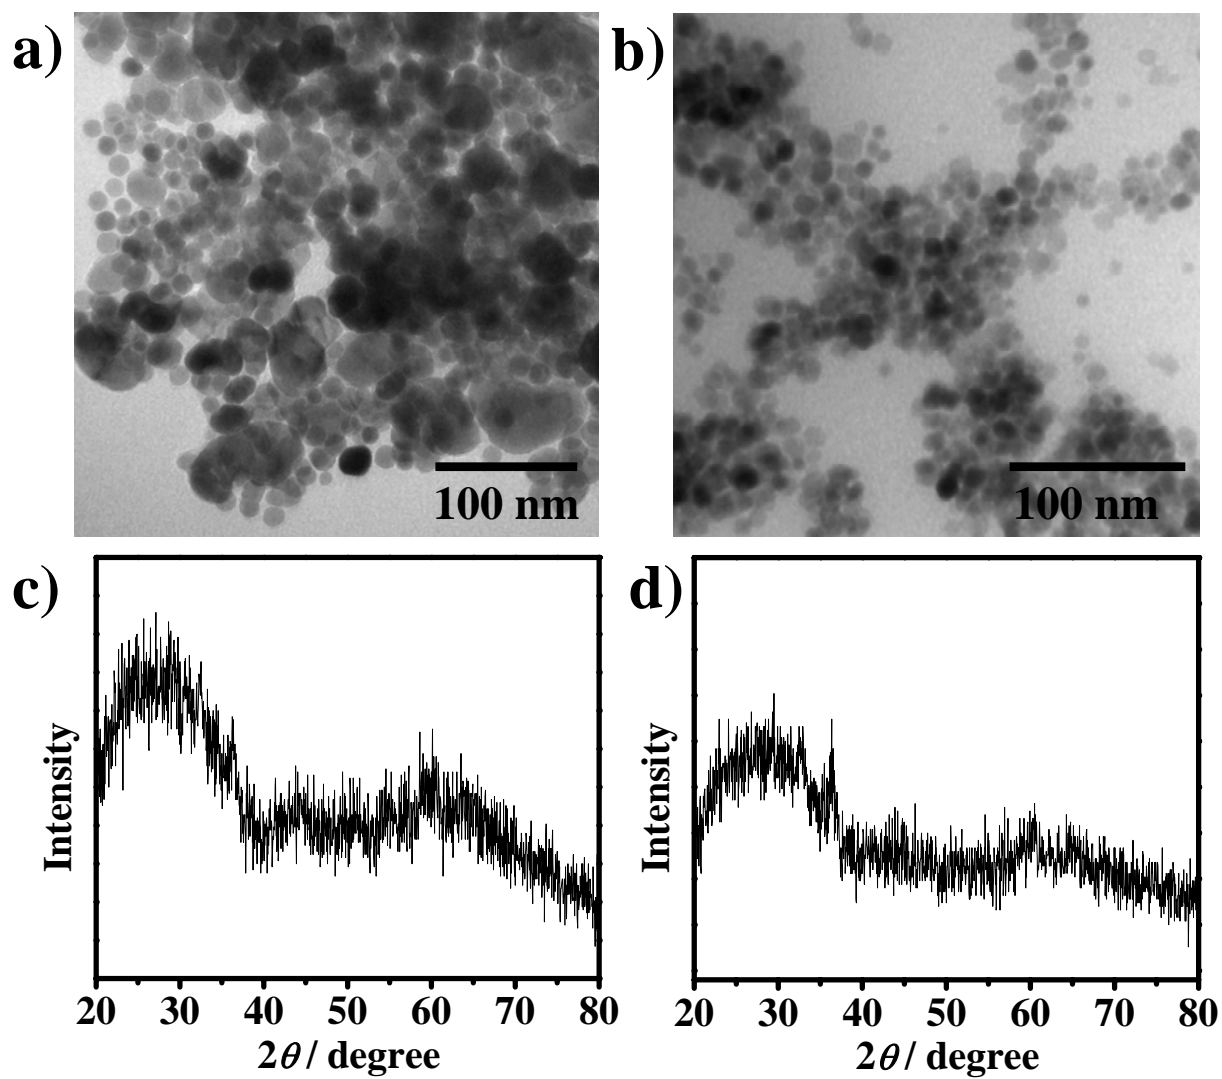

**Figure S4.** TEM images of a) Fe(SA)<sub>3</sub> and b) Mn(SA)<sub>3</sub> only after a 12-hour solvothermal reaction at 240 °C.

The XRD measurements from TEM images of a) and b) corresponded to those in c) and d), respectively.

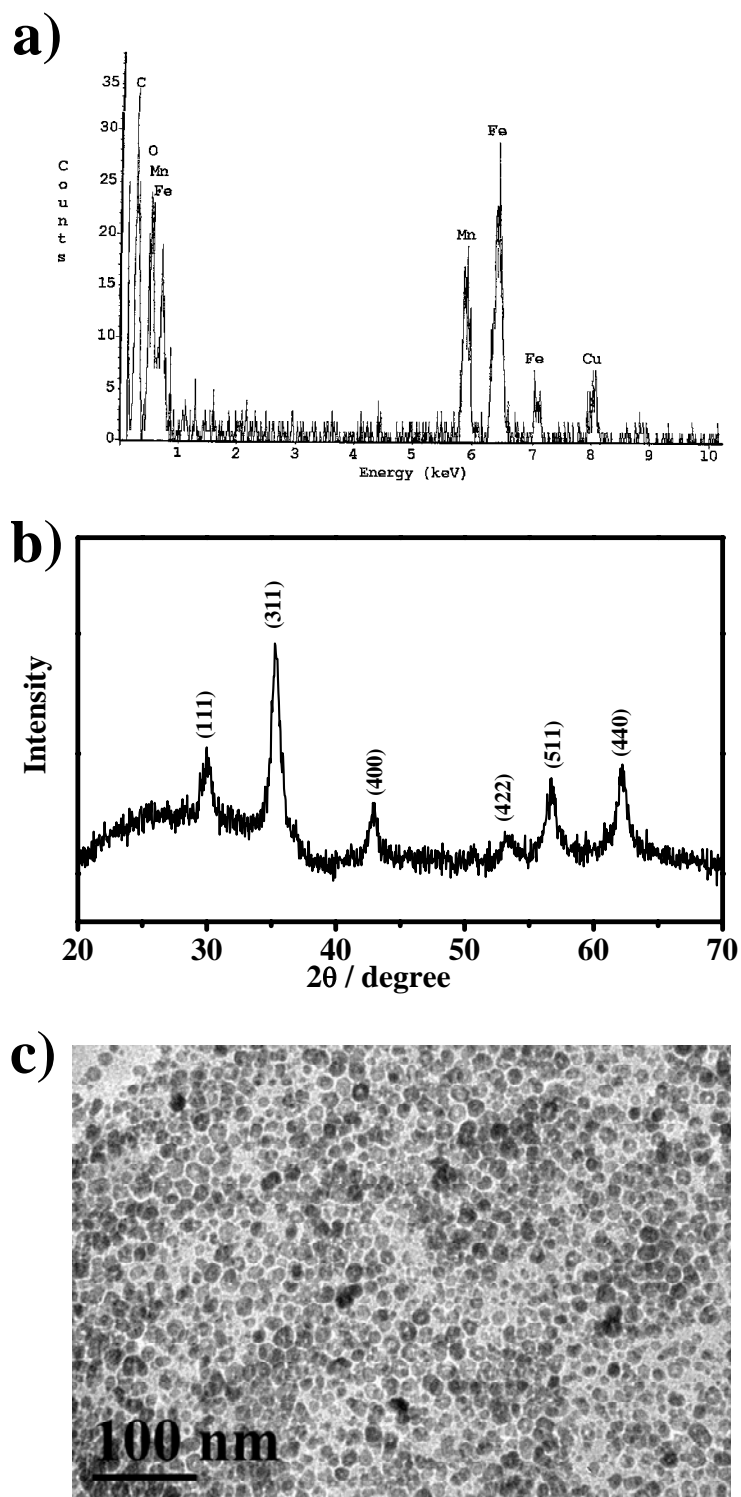

**Figure S5.** a) EDS analysis, b) XRD measurement, and c) TEM image for a 12-hour solvothermal reaction of  $\text{Fe}(\text{SA})_3$  and  $\text{Mn}(\text{SA})_2$  reacted with a  $[\text{Fe}^{3+}]/[\text{M}^{2+}]$  ratio of 2: 1 in 1-octanol solvent at 240 °C.

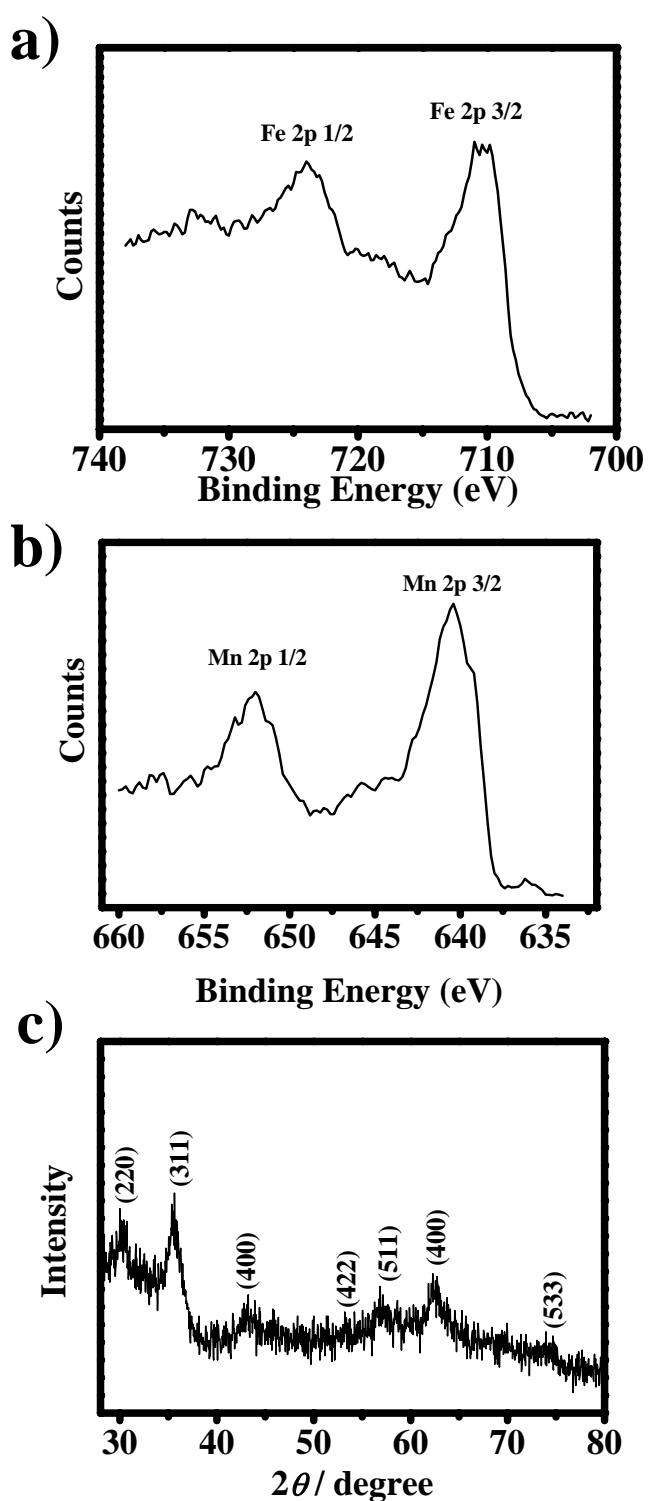

**Figure S6.** High-resolution XPS measurements of core-level spectra of a) Fe 2p and b) Mn 2p and c) XRD measurement for Mn<sub>3</sub>O<sub>4</sub> nanoplates after a 12-hour solvothermal reaction with Fe(SA)<sub>3</sub> at 240 °C.



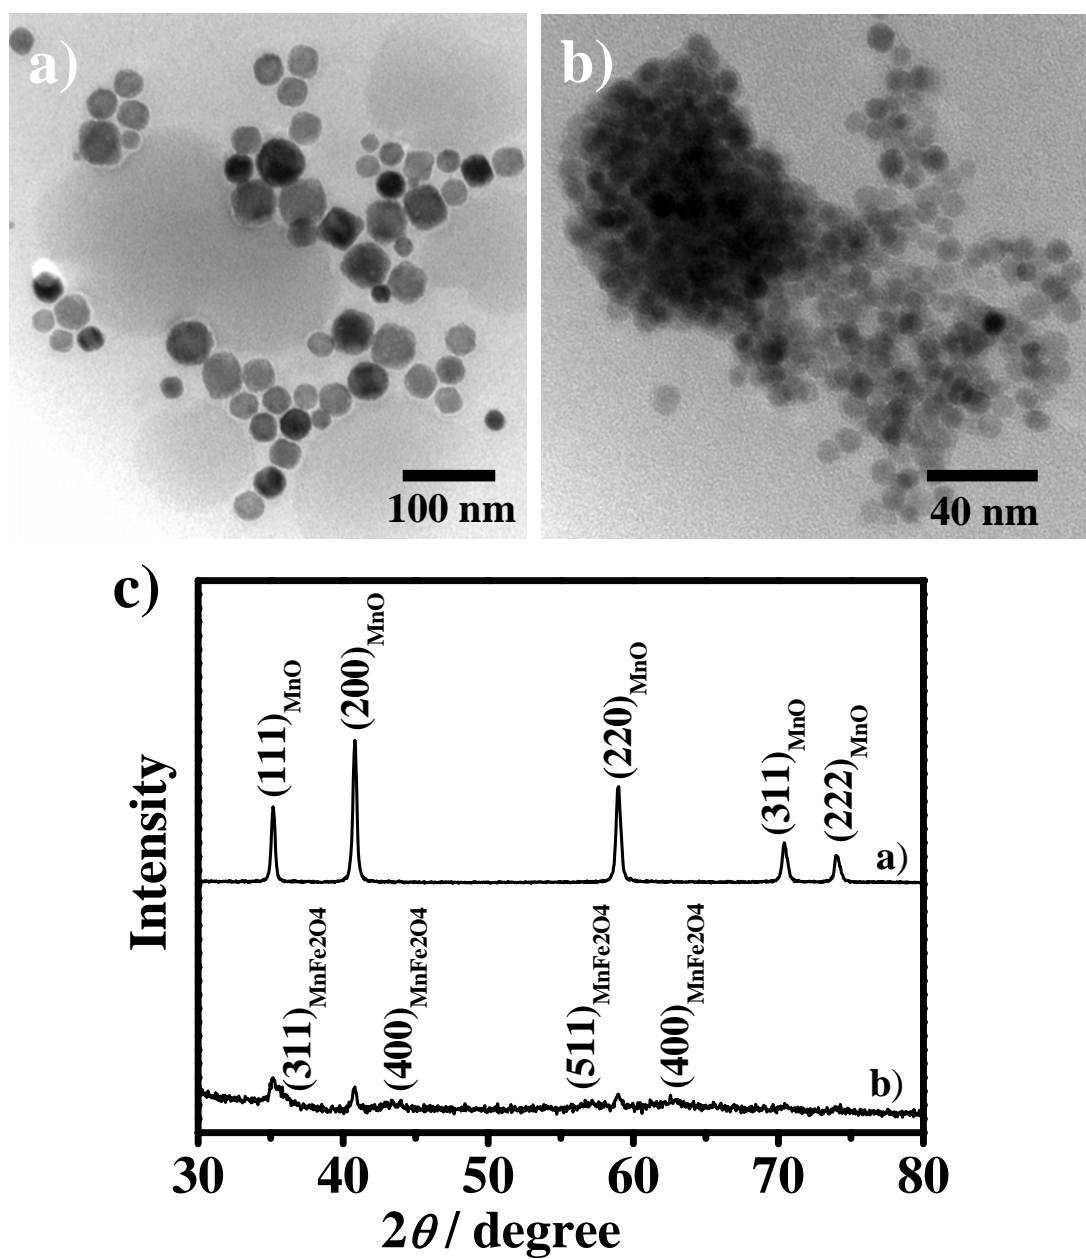

**Figure S7.** TEM images of a) MnO nanoparticles after a 12-hour solvothermal reaction with  $\text{Fe}(\text{SA})_3$  at 240 °C. b). The XRD measurements c) were done using the products of the TEM images in a) and b).



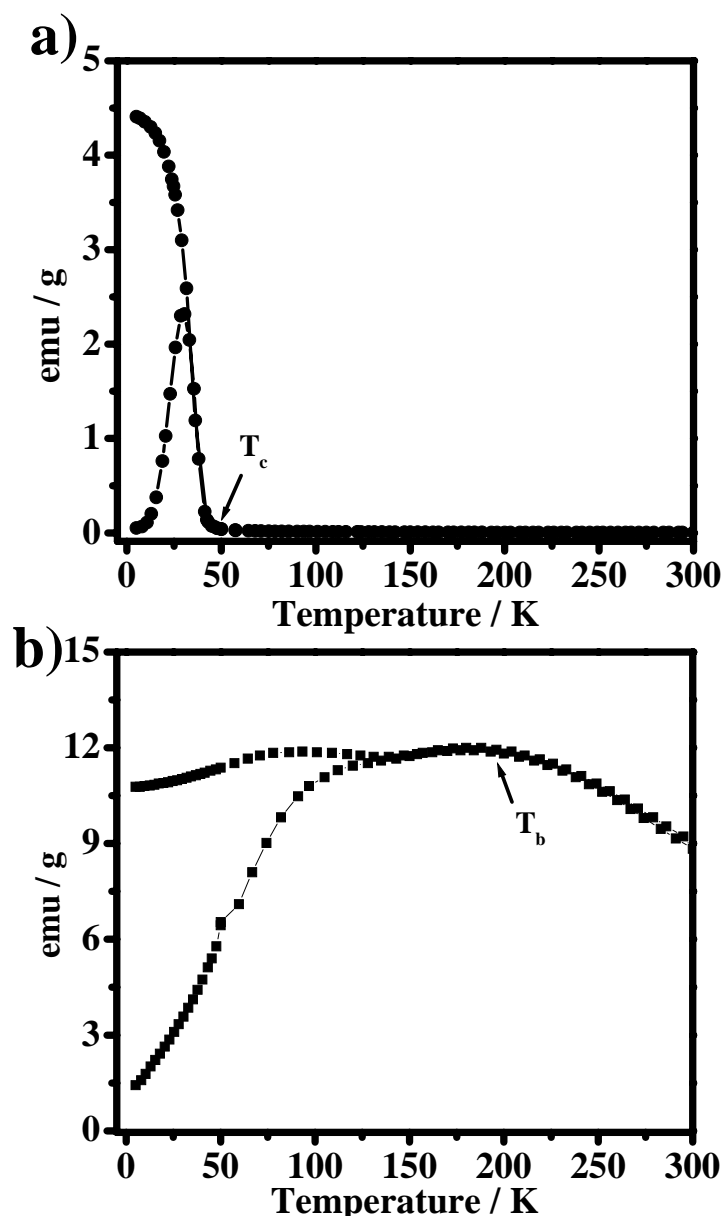

**Figure S8.** Zero-field-cool (ZFC) and field-cool (FC) magnetization plots in a temperature range between 5 K and 300 K under a 100-Oe field for Mn<sub>2.5</sub>Fe<sub>0.5</sub>O<sub>4</sub> nanorods and Mn<sub>1.4</sub>Fe<sub>1.6</sub>O<sub>4</sub> nanotubes, where the T<sub>c</sub> (~ 42 K) and T<sub>b</sub> (~ 190 K) indicate the Curie–Weiss temperatures and blocking temperatures, respectively. It has been reported that tetragonal-structured bulk Mn<sub>3</sub>O<sub>4</sub><sup>1</sup> and nano-sized Mn<sub>3</sub>O<sub>4</sub><sup>2</sup> exhibit ferromagnetic property at low temperature (~ 42 K), where turns into paramagnetic behavior above the T<sub>c</sub> due to the absence of moment alignments of manganese atoms. Mn<sub>2.5</sub>Fe<sub>0.5</sub>O<sub>4</sub> showed a tetragonal crystal phase and may follow the magnetic behaviors as that of Mn<sub>3</sub>O<sub>4</sub>. For magnetic crystallites of cubic structure, when the size of nanoparticles reduced to certain size range, they exhibited a superparamagnetism at temperatures above T<sub>b</sub>.<sup>3</sup> In ZFC-FC curve, that the magnetization of Mn<sub>1.4</sub>Fe<sub>1.6</sub>O<sub>4</sub> nanotubes decreases at temperatures above T<sub>b</sub> indicated a superparamagnetic behavior due to the increase in thermal fluctuation.

- (1) Dwight, K.; Menyuk, N. *Phys. Rev.* **1960**, *119*, 1470.
- (2) Zhao, V.; Nie, W.; Liu, X.; Tian, X.; Zhang, Y.; Ji, X. *Small* **2008**, *4*, 77.
- (3) Krishnan, K. M.; Pakhomov, A. B.; Bao, Y.; Blomqvist, P.; Chun, Y.; Gonzales, M.; Griffin, K.; Ji, X.; Roberts, B. *J. Mater. Sci.* **2006**, *41*, 793.

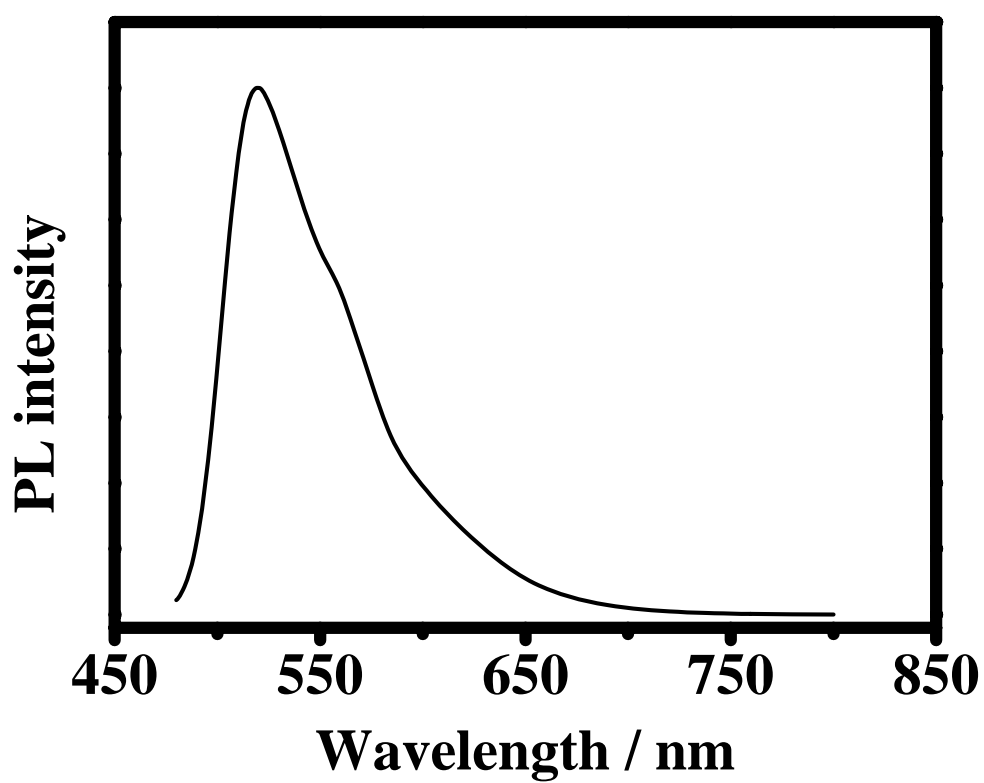

**Figure S9.** Fluorescence measurement for a Mn<sub>1.4</sub>Fe<sub>1.6</sub>O<sub>4</sub>@PAH nanotube conjugated with fluorescein isothiocyanate (FITC).

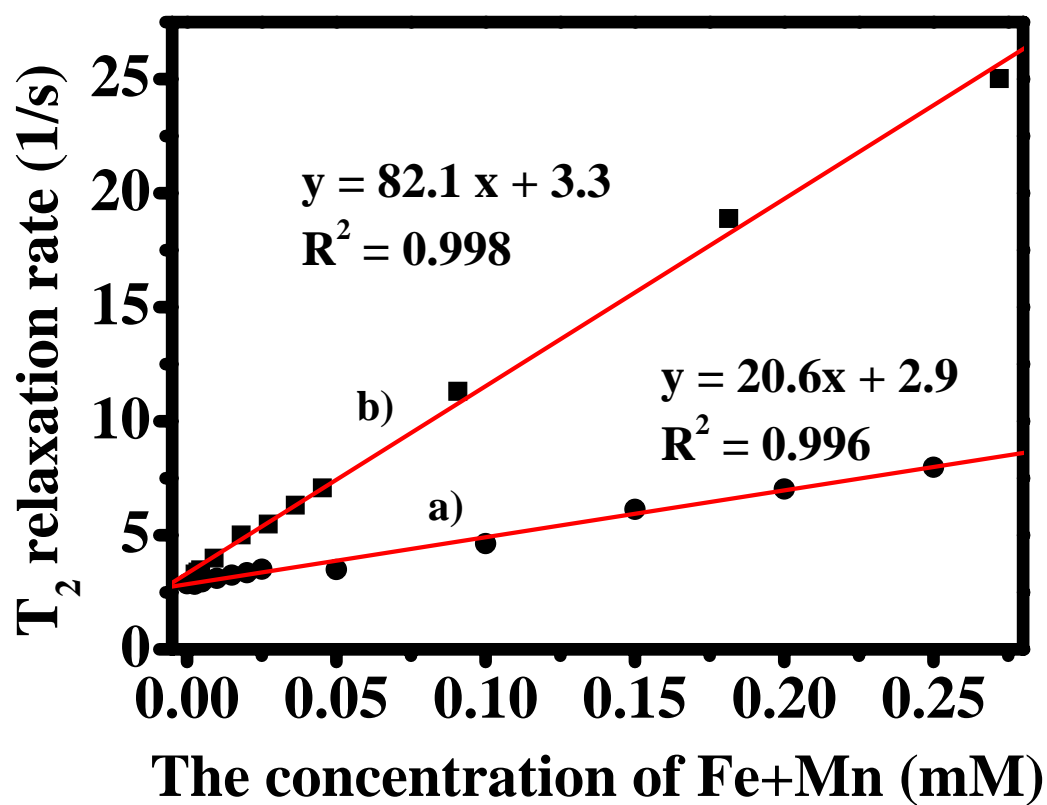

**Figure S10.** T<sub>2</sub> relaxation (1/T<sub>2</sub>, s<sup>-1</sup> (black curve)) rates of a) Mn<sub>2.5</sub>Fe<sub>0.5</sub>O<sub>4</sub>@PAH nanorods and b)

Mn<sub>1.4</sub>Fe<sub>1.6</sub>O<sub>4</sub>@PAH nanotubes.

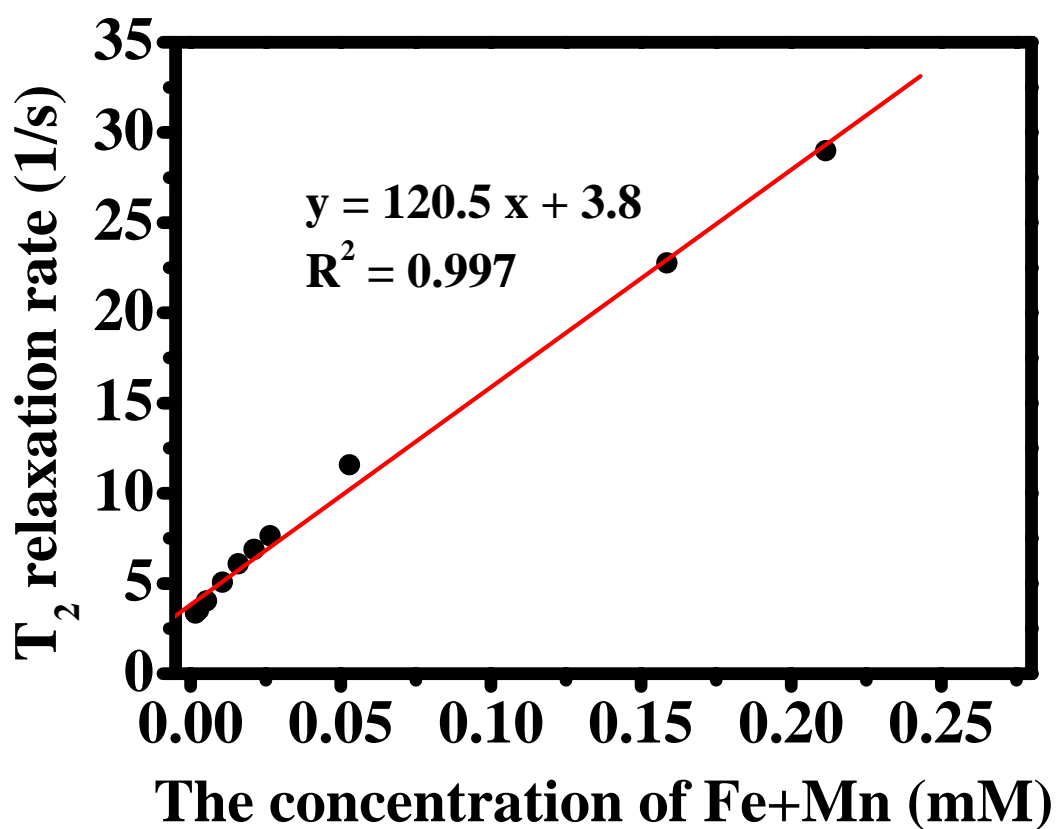

**Figure S11.** T<sub>2</sub> relaxation ( $1/T_2$ , s<sup>-1</sup> (black curve)) rates of hollow MnFe<sub>2</sub>O<sub>4</sub> nanoparticles from a 12-hour solvothermal reaction of Mn<sub>3</sub>O<sub>4</sub> nanoplates and Fe(SA)<sub>3</sub> at 240 °C.

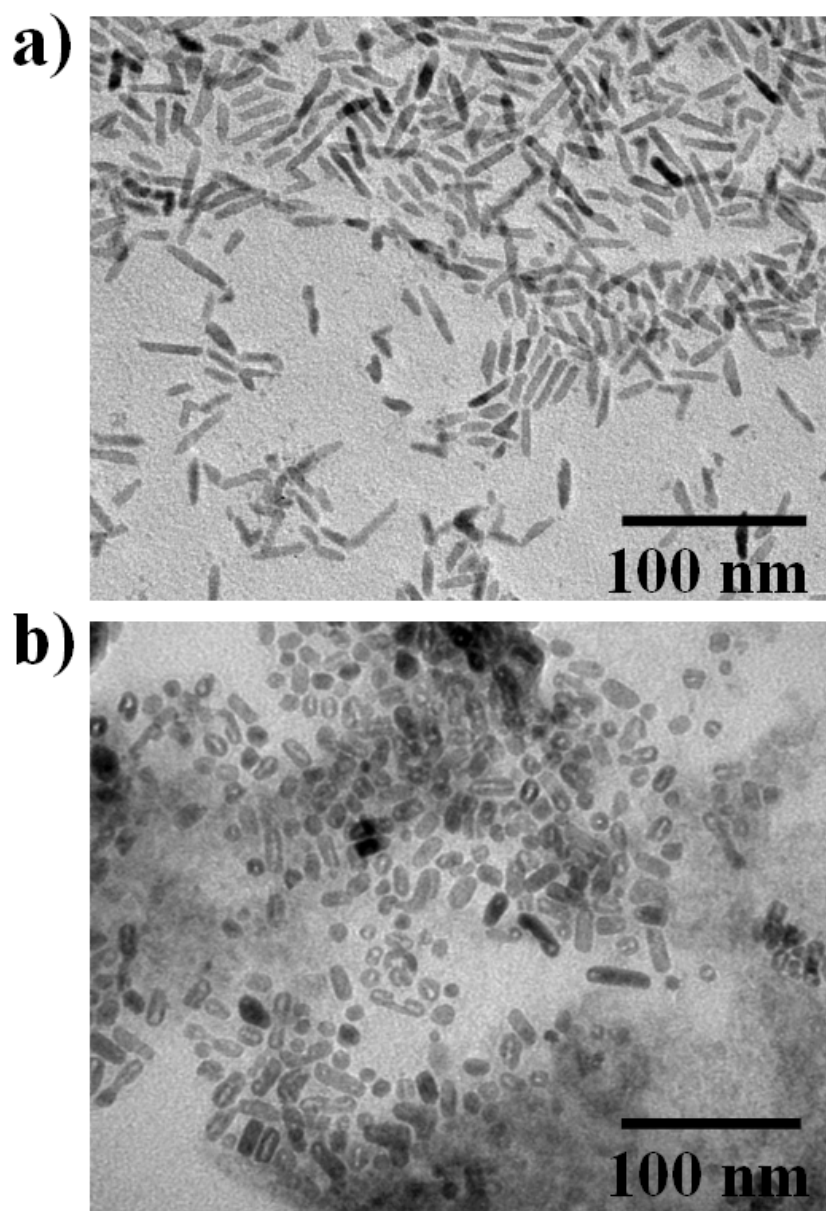

**Figure S12.** TEM images of Mn<sub>2.5</sub>Fe<sub>0.5</sub>O<sub>4</sub> nanorods a) and Mn<sub>1.4</sub>Fe<sub>1.6</sub>O<sub>4</sub> nanotubes b) determined after heterogeneous catalysis.
